# Supplementary material for: High Uric Acid Levels in Acute Myocardial Infarction Provide Better Long-Term Prognosis Predictive Power When Combined with Traditional Risk Factors
Source: MDPI journal article supplement (doi:10.3390/jcm11195531), 2022-09-21
Supplement: s1 [file s1]

## Supplemental materials

**Table S1.** Baseline Clinical and Medication Characteristics (After IPW Adjustment).

|                                        | Total<br>(n = 5888) | Normal<br>uric acid<br>(n = 4326) | Original Cohort                 |         |                     | absolute<br>SMD  | After IPW-Adjusted |         |                 |  |
|----------------------------------------|---------------------|-----------------------------------|---------------------------------|---------|---------------------|------------------|--------------------|---------|-----------------|--|
|                                        |                     |                                   | High<br>uric acid<br>(n = 1562) | p-value | Normal<br>uric acid |                  | High<br>uric acid  | p-value | absolute<br>SMD |  |
| Clinical characteristics               |                     |                                   |                                 |         |                     |                  |                    |         |                 |  |
| Age, year                              | 64.0 ± 12.7         | 63.6 ± 12.4                       | 65.4 ± 13.3                     | <0.001  | 0.141               | 64.0 ± 12.4      | 63.8 ± 13.5        | 0.589   | 0.017           |  |
| Age ≥65 year                           | 3010<br>(51.1)      | 2119 (49.0)                       | 891 (57.0)                      | <0.001  | 0.162               | 3010.7<br>(50.8) | 3045.2<br>(52.1)   | 0.419   | 0.025           |  |
| Male                                   | 4141<br>(70.3)      | 3085 (71.3)                       | 1056 (67.6)                     | 0.007   | 0.081               | 4183.7<br>(70.6) | 4159.4<br>(71.2)   | 0.703   | 0.012           |  |
| BMI, kg/m2                             | 24.1 ± 3.2          | 24.0 ± 3.2                        | 24.3 ± 3.4                      | 0.022   | 0.069               | 24.1 ± 3.2       | 24.1 ± 3.3         | 0.921   | 0.003           |  |
| BMI >25 kg/m2                          | 2069<br>(35.1)      | 1485 (34.3)                       | 584 (37.4)                      | 0.032   | 0.064               | 2060.1<br>(34.8) | 2064.6<br>(35.3)   | 0.713   | 0.011           |  |
| DM                                     | 2232<br>(37.9)      | 1584 (36.6)                       | 648 (41.5)                      | 0.001   | 0.1                 | 2265.3<br>(38.2) | 2215.9<br>(37.9)   | 0.827   | 0.007           |  |
| Hypertension                           | 4182<br>(71.0)      | 3008 (69.5)                       | 1174 (75.2)                     | <0.001  | 0.126               | 4212.8<br>(71.1) | 4146.9<br>(70.9)   | 0.906   | 0.004           |  |
| History of dyslipidemia                | 1371<br>(23.3)      | 1013 (23.4)                       | 358 (22.9)                      | 0.716   | 0.012               | 1365.3<br>(23.0) | 1348.7<br>(23.1)   | 0.985   | 0.001           |  |
| History of Stroke                      | 472 (8.0)           | 326 (7.5)                         | 146 (9.3)                       | 0.027   | 0.065               | 480.2 (8.1)      | 485.5 (8.3)        | 0.811   | 0.007           |  |
| Current smoker                         | 2280<br>(38.7)      | 1724 (39.9)                       | 556 (35.6)                      | 0.003   | 0.088               | 2284.4<br>(38.6) | 2276.9<br>(39.0)   | 0.8     | 0.008           |  |
| Previous MI                            | 259 (4.4)           | 187 (4.3)                         | 72 (4.6)                        | 0.688   | 0.014               | 278.8 (4.7)      | 241.7 (4.1)        | 0.401   | 0.028           |  |
| Previous PCI                           | 456 (7.7)           | 327 (7.6)                         | 129 (8.3)                       | 0.406   | 0.026               | 479.4 (8.1)      | 464.0 (7.9)        | 0.862   | 0.006           |  |
| Previous CABG                          | 32 (0.5)            | 22 (0.5)                          | 10 (0.6)                        | 0.685   | 0.017               | 34.0 (0.6)       | 29.1 (0.5)         | 0.723   | 0.01            |  |
| Atrial fibrillation on<br>baseline ECG | 224 (3.8)           | 144 (3.3)                         | 80 (5.1)                        | 0.002   | 0.089               | 223.7 (3.8)      | 218.5 (3.7)        | 0.942   | 0.002           |  |
| eGFR <30 mL/min/1.73<br>m2             | 412 (7.0)           | 183 (4.2)                         | 229 (14.7)                      | <0.001  | 0.362               | 461.4 (7.8)      | 433.2 (7.4)        | 0.631   | 0.014           |  |
| Chronic liver disease                  | 59 (1.0)            | 43 (1.0)                          | 16 (1.0)                        | 1       | 0.003               | 58.2 (1.0)       | 62.9 (1.1)         | 0.765   | 0.009           |  |
| Chronic lung disease                   | 153 (2.6)           | 101 (2.3)                         | 52 (3.3)                        | 0.043   | 0.06                | 152.7 (2.6)      | 162.1 (2.8)        | 0.692   | 0.012           |  |
| Cancer                                 | 198 (3.4)           | 142 (3.3)                         | 56 (3.6)                        | 0.626   | 0.017               | 197.7 (3.3)      | 212.8 (3.6)        | 0.595   | 0.016           |  |
| LVEF                                   | 52.7 ± 11.6         | 53.4 ± 11.1                       | 50.5 ± 12.6                     | <0.001  | 0.248               | 52.5 ± 11.7      | 52.7 ± 11.8        | 0.63    | 0.015           |  |
| LVEF ≤35%                              | 505 (8.6)           | 288 (6.7)                         | 217 (13.9)                      | <0.001  | 0.24                | 533.5 (9.0)      | 511.3 (8.7)        | 0.757   | 0.009           |  |
| ST-segment elevation MI                | 3095<br>(52.6)      | 2313 (53.5)                       | 782 (50.1)                      | 0.023   | 0.068               | 3098.9<br>(52.3) | 3090.8<br>(52.9)   | 0.72    | 0.011           |  |
| ACEF score                             | 1.4 ± 0.6           | 1.3 ± 0.6                         | 1.5 ± 0.7                       | <0.001  | 0.371               | 1.4 ± 0.6        | 1.4 ± 0.6          | 0.529   | 0.02            |  |
| Medication at discharge                |                     |                                   |                                 |         |                     |                  |                    |         |                 |  |
| Aspirin                                | 5793<br>(98.4)      | 4258 (98.4)                       | 1535 (98.3)                     | 0.761   | 0.012               | 5825.1<br>(98.3) | 5758.2<br>(98.5)   | 0.638   | 0.014           |  |
| Clopidogrel                            | 5151<br>(87.5)      | 3761 (86.9)                       | 1390 (89.0)                     | 0.04    | 0.063               | 5189.8<br>(87.6) | 5126.2<br>(87.7)   | 0.935   | 0.003           |  |
| Ticagrelor                             | 331 (5.6)           | 240 (5.5)                         | 91 (5.8)                        | 0.73    | 0.012               | 327.6 (5.5)      | 321.7 (5.5)        | 0.97    | 0.001           |  |
| Prasugrel                              | 371 (6.3)           | 301 (7.0)                         | 70 (4.5)                        | 0.001   | 0.107               | 370.4 (6.3)      | 361.8 (6.2)        | 0.94    | 0.003           |  |
| Potent P2Y12 inhibitor                 | 702 (11.9)          | 541 (12.5)                        | 161 (10.3)                      | 0.024   | 0.069               | 698.0 (11.8)     | 683.6 (11.7)       | 0.932   | 0.003           |  |
| Beta-blocker                           | 5131<br>(87.1)      | 3824 (88.4)                       | 1307 (83.7)                     | <0.001  | 0.137               | 5160.3<br>(87.1) | 5086.4<br>(87.0)   | 0.922   | 0.003           |  |
| ACEi or ARB                            | 4443<br>(75.5)      | 3333 (77.0)                       | 1110 (71.1)                     | <0.001  | 0.137               | 4473.1<br>(75.5) | 4462.9<br>(76.3)   | 0.514   | 0.02            |  |
| Oral anticoagulant                     | 154 (2.6)           | 97 (2.2)                          | 57 (3.6)                        | 0.004   | 0.083               | 152.0 (2.6)      | 155.0 (2.7)        | 0.85    | 0.005           |  |
| Statin at discharge                    | 5638<br>(95.8)      | 4154 (96.0)                       | 1484 (95.0)                     | 0.102   | 0.049               | 5672.0<br>(95.7) | 5594.9<br>(95.7)   | 0.955   | 0.002           |  |

Data are presented as the n (%) for categorical variables and as the mean ± standard deviation for continuous variables. PS indicates propensity-score; IPW, inverse probability weighted; SMD, standardized mean differences; BMI, body mass index; DM, diabetes mellitus; MI, myocardial infarction; CABG, coronary artery bypass graft; ECG, electrocardiography; eGFR, estimated

glomerular filtration rate; LVEF, left ventricle ejection fraction; ACEi, angiotensin converting enzyme inhibitors; ARB, angiotensin II receptor blockers.

**Table S2.** Baseline Laboratory and Angiographic Characteristics (After IPW Adjustment).

|                                 | Total<br>(n = 5888) | Original Cohort                   |                                 |             |                 | After IPW-Adjusted  |                   |             |                 |  |
|---------------------------------|---------------------|-----------------------------------|---------------------------------|-------------|-----------------|---------------------|-------------------|-------------|-----------------|--|
|                                 |                     | Normal<br>uric acid<br>(n = 4326) | High<br>uric acid<br>(n = 1562) | p-<br>value | absolute<br>SMD | Normal<br>uric acid | High<br>uric acid | p-<br>value | absolute<br>SMD |  |
| Laboratory findings             |                     |                                   |                                 |             |                 |                     |                   |             |                 |  |
| Uric acid, mg/dL                | 5.6 ± 4.0           | 4.3 ± 1.4                         | 9.1 ± 6.1                       | <0.001      | 1.071           | 4.3 ± 1.4           | 9.2 ± 6.9         | <0.001      | 0.991           |  |
| Uric acid, μmol/L               | (333.1 ± 237.9)     | (255.8 ± 83.3)                    | (541.3 ± 362.8)                 |             |                 | (255.8 ± 83.3)      | (547.2 ± 410.4)   |             |                 |  |
| CK-MB, peak, ng/mL              | 130.0 ± 753.8       | 124.4 ± 267.3                     | 145.2 ± 1394.5                  | 0.558       | 0.021           | 124.3 ± 276.3       | 140.0 ± 1175.9    | 0.539       | 0.018           |  |
| Hemoglobin, mg/dL               | 13.4 ± 2.2          | 13.5 ± 2.1                        | 13.1 ± 2.5                      | <0.001      | 0.154           | 13.4 ± 2.1          | 13.4 ± 2.3        | 0.562       | 0.018           |  |
| Creatinine, mg/dL               | 1.2 ± 1.2           | 1.1 ± 1.0                         | 1.5 ± 1.5                       | <0.001      | 0.344           | 1.3 ± 1.7           | 1.3 ± 1.0         | 0.862       | 0.007           |  |
| high-sensitivity CRP, mg/dL     | 5.3 ± 18.5          | 5.1 ± 18.1                        | 5.7 ± 19.6                      | 0.286       | 0.032           | 5.4 ± 19.1          | 4.8 ± 17.3        | 0.205       | 0.038           |  |
| Total cholesterol, mg/dL        | 176.8 ± 43.2        | 176.7 ± 42.6                      | 177.1 ± 45.0                    | 0.772       | 0.009           | 175.7 ± 43.0        | 178.4 ± 43.7      | 0.043       | 0.063           |  |
| Triglyceride, mg/dL             | 122.2 ± 89.4        | 119.2 ± 84.4                      | 130.3 ± 101.7                   | <0.001      | 0.119           | 122.7 ± 90.7        | 122.5 ± 87.5      | 0.923       | 0.003           |  |
| High-density lipoprotein, mg/dL | 40.6 ± 10.8         | 41.0 ± 10.9                       | 39.4 ± 10.7                     | <0.001      | 0.149           | 40.5 ± 10.8         | 40.5 ± 11.3       | 0.894       | 0.005           |  |
| Low-density lipoprotein, mg/dL  | 112.3 ± 37.1        | 112.5 ± 37.0                      | 111.8 ± 37.6                    | 0.52        | 0.019           | 111.7 ± 37.1        | 113.0 ± 37.5      | 0.247       | 0.036           |  |
| Angiographic characteristics    |                     |                                   |                                 |             |                 |                     |                   |             |                 |  |
| Multivessel disease             | 3198 (54.3)         | 2259 (52.2)                       | 939 (60.1)                      | <0.001      | 0.16            | 3218.0 (54.3)       | 3139.7 (53.7)     | 0.698       | 0.012           |  |
| Left main PCI                   | 230 (3.9)           | 156 (3.6)                         | 74 (4.7)                        | 0.057       | 0.057           | 228.1 (3.9)         | 220.0 (3.8)       | 0.876       | 0.005           |  |
| Left anterior descending PCI    | 3515 (59.7)         | 2595 (60.0)                       | 920 (58.9)                      | 0.471       | 0.022           | 3580.0 (60.4)       | 3399.9 (58.2)     | 0.14        | 0.046           |  |
| Left circumflex PCI             | 1589 (27.0)         | 1188 (27.5)                       | 401 (25.7)                      | 0.183       | 0.041           | 1634.6 (27.6)       | 1482.3 (25.4)     | 0.106       | 0.051           |  |
| Right coronary artery PCI       | 2364 (40.1)         | 1718 (39.7)                       | 646 (41.4)                      | 0.269       | 0.033           | 2368.0 (40.0)       | 2392.3 (40.9)     | 0.535       | 0.019           |  |
| Total stent number              | 1.6 ± 0.9           | 1.6 ± 0.9                         | 1.6 ± 0.9                       | 0.103       | 0.048           | 1.6 ± 0.9           | 1.6 ± 0.9         | 0.968       | 0.001           |  |
| Total stent length              | 37.6 ± 25.0         | 37.2 ± 24.8                       | 38.6 ± 25.5                     | 0.05        | 0.058           | 37.5 ± 25.2         | 37.7 ± 24.8       | 0.796       | 0.008           |  |
| Bifurcation PCI with two stents | 91 (1.5)            | 57 (1.3)                          | 34 (2.2)                        | 0.025       | 0.066           | 90.3 (1.5)          | 86.2 (1.5)        | 0.884       | 0.004           |  |
| Long stenting >60mm             | 283 (4.8)           | 209 (4.8)                         | 74 (4.7)                        | 0.937       | 0.004           | 298.0 (5.0)         | 254.3 (4.3)       | 0.295       | 0.032           |  |
| Restenosis lesion               | 91 (1.5)            | 67 (1.5)                          | 24 (1.5)                        | 1           | 0.001           | 90.8 (1.5)          | 76.7 (1.3)        | 0.542       | 0.019           |  |
| Ostial lesion                   | 232 (3.9)           | 158 (3.7)                         | 74 (4.7)                        | 0.07        | 0.054           | 227.6 (3.8)         | 265.9 (4.5)       | 0.25        | 0.035           |  |
| Second generation DES           | 3499 (59.4)         | 2616 (60.5)                       | 883 (56.5)                      | 0.007       | 0.08            | 3511.4 (59.3)       | 3477.0 (59.5)     | 0.893       | 0.004           |  |

Data are presented as the n (%) for categorical variables and as the mean ± standard deviation for continuous variables. PS indicates propensity-score; IPW, inverse probability weighted; SMD, standardized mean differences; CK-MB, creatine kinase muscle brain; CRP, C-reactive protein; PCI, percutaneous coronary intervention; DES, drug-eluting stent.

**Table S3.** Predictive Factors for Mortality According to multivariable Cox Regression Analysis.

|                                     | Unadjusted       |          | Multivariable-adjusted |          |
|-------------------------------------|------------------|----------|------------------------|----------|
|                                     | HR (95% CI)      | p-value† | HR (95% CI)            | p-value† |
| High uric acid                      | 1.69 (1.52,1.88) | < 0.001  | 1.18 (1.05,1.32)       | 0.005    |
| Age ≥65 years                       | 5.01 (4.4,5.7)   | < 0.001  | 3.47 (3.01,4)          | < 0.001  |
| LVEF ≤35%                           | 3.19 (2.79,3.65) | < 0.001  | 2 (1.74,2.29)          | < 0.001  |
| Atrial fibrillation                 | 1.88 (1.53,2.32) | < 0.001  | 1.6 (1.28,1.99)        | < 0.001  |
| eGFR <30 mL/min/1.73 m <sup>2</sup> | 5.25 (4.6,5.99)  | < 0.001  | 1.52 (1.25,1.86)       | < 0.001  |

|                         |                  |         |                  |         |
|-------------------------|------------------|---------|------------------|---------|
| History of stroke       | 2.17 (1.87,2.51) | < 0.001 | 1.43 (1.23,1.67) | < 0.001 |
| Diabetes mellitus       | 1.77 (1.6,1.97)  | < 0.001 | 1.23 (1.1,1.37)  | < 0.001 |
| Creatinine              | 1.22 (1.19,1.24) | < 0.001 | 1.08 (1.04,1.12) | < 0.001 |
| ACEi or ARB             | 0.48 (0.43,0.53) | < 0.001 | 0.55 (0.49,0.62) | < 0.001 |
| Hemoglobin              | 0.75 (0.73,0.76) | < 0.001 | 0.88 (0.86,0.91) | < 0.001 |
| Body mass index         | 0.54 (0.48,0.61) | < 0.001 | 0.75 (0.67,0.85) | < 0.001 |
| Clopidogrel             | 1.63 (1.31,2.02) | < 0.001 | 0.6 (0.39,0.93)  | 0.021   |
| Triglyceride            | 1 (1,1)          | < 0.001 | 1 (1,1)          | 0.003   |
| HDL cholesterol         | 0.99 (0.98,0.99) | < 0.001 | 0.99 (0.99,1)    | 0.003   |
| Potent P2Y12 inhibitor  | 0.49 (0.38,0.63) | < 0.001 | 0.5 (0.3,0.85)   | 0.01    |
| LDL cholesterol         | 0.99 (0.99,0.99) | < 0.001 | 1 (1,1)          | 0.05    |
| ST-segment elevation MI | 0.68 (0.61,0.76) | < 0.001 | 0.92 (0.82,1.02) | 0.11    |
| Male                    | 0.57 (0.51,0.63) | < 0.001 | 1.1 (0.98,1.25)  | 0.113   |
| Prasugrel               | 0.31 (0.2,0.46)  | < 0.001 | 0.68 (0.41,1.13) | 0.135   |
| Chronic lung disease    | 1.92 (1.49,2.46) | < 0.001 | 1.2 (0.93,1.55)  | 0.155   |
| History of dyslipidemia | 0.74 (0.65,0.85) | < 0.001 | 1.09 (0.94,1.26) | 0.27    |
| hypertension            | 1.43 (1.27,1.62) | < 0.001 | 1.04 (0.92,1.18) | 0.542   |
| Current smoker          | 0.48 (0.43,0.54) | < 0.001 | 1.03 (0.9,1.18)  | 0.657   |
| Multivessel disease     | 1.44 (1.3,1.61)  | < 0.001 | 1.02 (0.91,1.14) | 0.712   |
| Oral anticoagulant      | 1.41 (1.06,1.88) | 0.019   | 0.95 (0.71,1.28) | 0.75    |

†p value from Cox regression. High uric acid is defined as >6.5mg/dL for male and >5.8mg/dL for female. HR indicates hazard ratio; CI, confidence interval; LVEF, left ventricular ejection fraction; ACEi, angiotensin converting enzyme inhibitors; ARB, angiotensin II receptor blockers; eGFR, estimated glomerular filtration rate; HDL, high density lipoprotein; LDL, low density lipoprotein; MI, myocardial infarction.

(A) eGFR  $\geq 30$  (mL/min/1.73 m<sup>2</sup>)

(B) eGFR <30 (mL/min/1.73 m<sup>2</sup>)

All-cause death

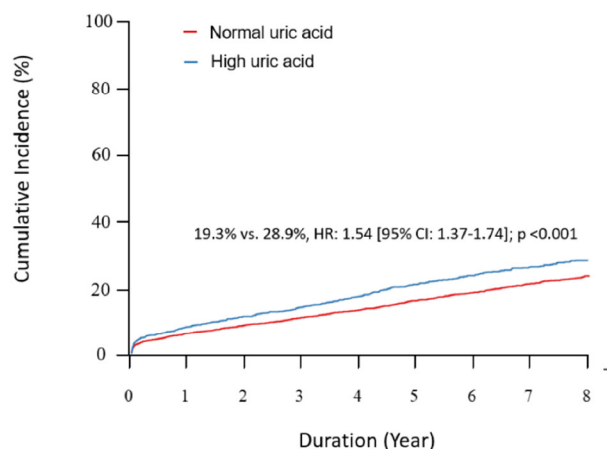

Number at risk

|                  |      |      |      |      |      |      |      |      |     |
|------------------|------|------|------|------|------|------|------|------|-----|
| Normal uric acid | 4143 | 3758 | 3578 | 3364 | 2700 | 2225 | 1655 | 1238 | 916 |
| High uric acid   | 1333 | 1148 | 1077 | 1005 | 815  | 662  | 513  | 419  | 317 |

All-cause death

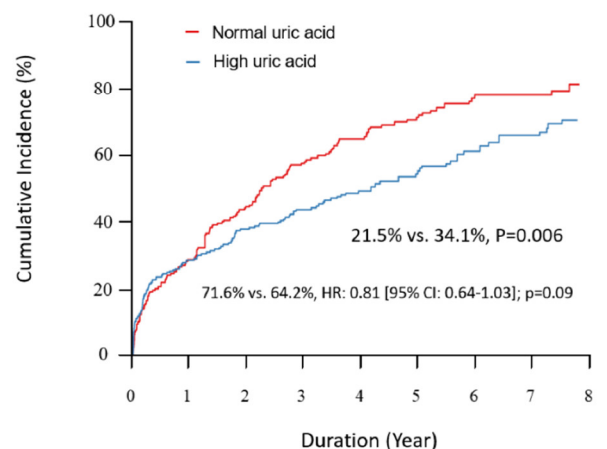

Number at risk

|                  |     |     |     |     |    |    |    |    |    |
|------------------|-----|-----|-----|-----|----|----|----|----|----|
| Normal uric acid | 183 | 124 | 97  | 70  | 47 | 34 | 19 | 13 | 6  |
| High uric acid   | 229 | 150 | 128 | 107 | 71 | 52 | 38 | 27 | 19 |

**Figure S1.** Kaplan-Meier Curve With Cumulative Hazards of All-cause Death Compared According to the Uric Acid Level in the Subgroups of (A) eGFR  $\geq 30$  mL/min/1.73 m<sup>2</sup> and (B) eGFR <30 mL/min/1.73 m<sup>2</sup>.
